# Supplementary material for: Exploring the intermediates of photochemical CO2reduction: reaction of Re(dmb)(CO)3 COOH with CO2
Source: Royal Society of Chemistry journal article supplement (doi:10.1039/c2cc32288a), 2012-01-01
Supplement: c2cc32288a.pdf [file c2cc32288a.pdf]

## Supporting Information

# Exploring the Intermediates of Photochemical CO<sub>2</sub> Reduction:

## Reaction of Re(dmb)(CO)<sub>3</sub>COOH with CO<sub>2</sub>

Jay Agarwal,<sup>†,‡</sup> Brian C. Sanders,<sup>¶</sup> Etsuko Fujita,<sup>‡</sup> Henry F. Schaefer III,<sup>\*,†</sup>  
Todd C. Harrop,<sup>¶</sup> and James T. Muckerman<sup>\*,‡</sup>

*Center for Computational Quantum Chemistry*

*University of Georgia, Athens, GA 30602, Chemistry Department*

*Brookhaven National Laboratory, Upton, NY, 11973, and Chemistry Department*

*University of Georgia, Athens, GA 30602*

E-mail: fri@uga.edu; muckerma@bnl.gov

### Contents

- A. Complete Citation for Reference 20
- B. Data for Computed Stationary Points
- C. Experimental Methods
- D. Data from Experiment

---

<sup>†</sup>Center for Computational Quantum Chemistry, University of Georgia

<sup>‡</sup>Chemistry Department, Brookhaven National Laboratory

<sup>¶</sup>Chemistry Department, University of Georgia

### A. Complete Citation for Reference 20

(20) Gaussian 09, Revision B.01, Frisch, M. J.; Trucks, G. W.; Schlegel, H. B.; Scuseria, G. E.; Robb, M. A.; Cheeseman, J. R.; Scalmani, G.; Barone, V.; Mennucci, B.; Petersson, G. A.; Nakatsuji, H.; Caricato, M.; Li, X.; Hratchian, H. P.; Izmaylov, A. F.; Bloino, J.; Zheng, G.; Sonnenberg, J. L.; Hada, M.; Ehara, M.; Toyota, K.; Fukuda, R.; Hasegawa, J.; Ishida, M.; Nakajima, T.; Honda, Y.; Kitao, O.; Nakai, H.; Vreven, T.; Montgomery, Jr., J. A.; Peralta, J. E.; Ogliaro, F.; Bearpark, M.; Heyd, J. J.; Brothers, E.; Kudin, K. N.; Staroverov, V. N.; Kobayashi, R.; Normand, J.; Raghavachari, K.; Rendell, A.; Burant, J. C.; Iyengar, S. S.; Tomasi, J.; Cossi, M.; Rega, N.; Millam, N. J.; Klene, M.; Knox, J. E.; Cross, J. B.; Bakken, V.; Adamo, C.; Jaramillo, J.; Gomperts, R.; Stratmann, R. E.; Yazyev, O.; Austin, A. J.; Cammi, R.; Pomelli, C.; Ochterski, J. W.; Martin, R. L.; Morokuma, K.; Zakrzewski, V. G.; Voth, G. A.; Salvador, P.; Dannenberg, J. J.; Dapprich, S.; Daniels, A. D.; Farkas, Ę.; Foresman, J. B.; Ortiz, J. V.; Cioslowski, J.; Fox, D. J. Gaussian, Inc., Wallingford CT, 2009.

## B. Data for Computed Stationary Points

### 1

Charge = 0 Multiplicity = 1

Re -0.870789 -0.000049 -0.168570

N 0.885861 1.321933 -0.216571

N 0.885951 -1.321894 -0.216544

C 2.103548 0.732916 -0.096104

C 2.103602 -0.732794 -0.096116

C 0.815454 -2.664728 -0.261977

C 3.268667 -1.497867 -0.015595

C 3.186132 -2.881597 -0.057186

C 1.934580 -3.478142 -0.187454

C 0.815275 2.664763 -0.261990

C 1.934344 3.478251 -0.187405

C 3.185930 2.881787 -0.057079

C 3.268555 1.498063 -0.015507

C -2.212603 1.341350 0.060429

C -2.212497 -1.341556 0.060466

O -3.011111 2.183232 0.226030

O -3.010941 -2.183515 0.225985

C -1.108530 0.000064 -2.111054

O -1.294616 0.000198 -3.264314

H -0.179685 -3.085271 -0.362014

H 4.233641 -1.014067 0.077972

H 4.085370 -3.485002 0.006111

H 1.819265 -4.554813 -0.229407

H -0.179889 3.085242 -0.362056

H 1.818958 4.554915 -0.229348

H 4.085123 3.485253 0.006273

H 4.233550 1.014322 0.078113

C -0.450029 0.000028 1.997186

O -1.546081 0.000166 2.830941

O 0.663049 -0.000151 2.521452

H -1.206822 0.000188 3.744467

Zero-point correction = 0.210078 (Hartree/Particle)

Thermal correction to Energy = 0.230377

Thermal correction to Enthalpy = 0.231321

Thermal correction to Gibbs Free Energy = 0.159254

Sum of electronic and zero-point Energies = -1103.570744

Sum of electronic and thermal Energies = -1103.550445

Sum of electronic and thermal Enthalpies = -1103.549501

Sum of electronic and thermal Free Energies = -1103.621569

**2**

Charge = 0 Multiplicity = 1

C 0.000000 0.000000 0.000000

O 0.000000 0.000000 1.168469

O 0.000000 0.000000 -1.168469

Zero-point correction = 0.011748 (Hartree/Particle)

Thermal correction to Energy = 0.014375

Thermal correction to Enthalpy = 0.015319

Thermal correction to Gibbs Free Energy = -0.008961

Sum of electronic and zero-point Energies = -188.571170

Sum of electronic and thermal Energies = -188.568543

Sum of electronic and thermal Enthalpies = -188.567598

Sum of electronic and thermal Free Energies = -188.591878

### TS 3

Charge = 0 Multiplicity = 1

Re -0.209337 -0.626366 0.486335

N 1.737200 -0.699012 -0.556850

N 0.630534 1.412895 0.582929

C 2.454897 0.453363 -0.630643

C 1.843536 1.623937 0.008013

C -0.004861 2.444267 1.165988

C 2.439747 2.884682 0.032331

C 1.784114 3.941449 0.648835

C 0.536787 3.718934 1.223538

C 2.231554 -1.812477 -1.126974

C 3.449520 -1.837362 -1.787988

C 4.190719 -0.662530 -1.867347

C 3.686903 0.491410 -1.283602

C -0.771202 -2.432314 0.176380

C -1.869537 -0.251189 1.376589

O -1.090438 -3.535385 -0.039529

O -2.852178 0.023048 1.941464

C 0.595580 -1.159862 2.186851

O 1.068267 -1.501048 3.193582

H -0.978398 2.225254 1.590369

H 3.408821 3.039500 -0.426204

H 2.240927 4.925031 0.676216

H -0.014745 4.513998 1.710971

H 1.619115 -2.703828 -1.042386

H 3.801231 -2.762901 -2.228220

H 5.147673 -0.642365 -2.377841

H 4.248103 1.416660 -1.336283

C -0.953546 -0.022759 -1.432917

O -2.148449 1.363203 -1.062790

O -0.887645 -0.171637 -2.593375

H -1.959052 2.056198 -1.713724

O -3.910455 -0.320733 -1.144577

C -3.811040 0.809930 -1.536950

O -4.329919 1.739530 -2.097674

Imaginary Frequency = 482.94i

Zero-point correction = 0.220213 (Hartree/Particle)

Thermal correction to Energy = 0.244371

Thermal correction to Enthalpy = 0.245315

Thermal correction to Gibbs Free Energy = 0.163018

Sum of electronic and zero-point Energies = -1292.104132

Sum of electronic and thermal Energies = -1292.079974

Jay Agarwal et al.

Supporting Information

...

Sum of electronic and thermal Enthalpies = -1292.079029

Sum of electronic and thermal Free Energies = -1292.161327

4

Charge = 1 Multiplicity = 1

Re -0.883109 -0.000001 0.000173

N 0.878637 1.325293 -0.000214

N 0.878636 -1.325295 -0.000022

C 2.102574 0.732852 -0.000337

C 2.102574 -0.732855 -0.000313

C 0.801766 -2.668504 0.000040

C 3.268029 -1.498174 -0.000591

C 3.181215 -2.883023 -0.000524

C 1.925153 -3.480378 -0.000192

C 0.801770 2.668503 -0.000254

C 1.925158 3.480375 -0.000411

C 3.181219 2.883019 -0.000507

C 3.268031 1.498169 -0.000468

C -2.253429 1.364853 0.000282

C -2.253450 -1.364835 0.000622

O -3.053034 2.207074 -0.000168

O -3.053086 -2.207025 0.000525

C -0.886117 -0.000117 -2.012822

O -0.922620 -0.000918 -3.162901

H -0.196405 -3.091966 0.000277

H 4.237251 -1.014171 -0.000879

H 4.082542 -3.485888 -0.000733

H 1.806338 -4.557136 -0.000125

H -0.196401 3.091967 -0.000155

H 1.806344 4.557133 -0.000441

H 4.082547 3.485882 -0.000610

H 4.237252 1.014164 -0.000520

C -0.885384 0.000130 2.013166

O -0.921490 0.000870 3.163257

Zero-point correction = 0.195284 (Hartree/Particle)

Thermal correction to Energy = 0.214361

Thermal correction to Enthalpy = 0.215305

Thermal correction to Gibbs Free Energy = 0.145781

Sum of electronic and zero-point Energies = -1027.603539

Sum of electronic and thermal Energies = -1027.584461

Sum of electronic and thermal Enthalpies = -1027.583517

Sum of electronic and thermal Free Energies = -1027.653042

**5**

Charge = -1 Multiplicity = 1

O -1.188587 -0.615036 -0.000094

C -0.139464 0.059107 0.000003

O 0.032379 1.300804 -0.000009

O 1.039754 -0.719341 0.000084

H 1.768411 -0.086054 0.000129

Zero-point correction = 0.026349 (Hartree/Particle)

Thermal correction to Energy = 0.029866

Thermal correction to Enthalpy = 0.030810

Thermal correction to Gibbs Free Energy = 0.000590

Sum of electronic and zero-point Energies = -264.517108

Sum of electronic and thermal Energies = -264.513591

Sum of electronic and thermal Enthalpies = -264.512647

Sum of electronic and thermal Free Energies = -264.542867



## TS 6

Charge = 0 Multiplicity = 1

C -0.853149 -1.804361 1.853021  
O -0.722896 -0.549059 1.885655  
O -0.091844 -2.649244 1.337479  
O 2.406773 -2.573057 -0.970575  
O 3.584998 1.551720 0.136377  
C 1.872403 -1.566229 -0.730031  
C 2.586555 0.965720 -0.018206  
O 1.184462 0.922747 -3.252085  
C 1.079906 0.589214 -2.133218  
Re 0.926796 0.065768 -0.349246  
H -0.502546 -2.530093 -1.508712  
H 1.023025 3.003658 0.806828  
C -1.362721 -1.892078 -1.338031  
N -1.105826 -0.685429 -0.809199  
C -0.047798 2.866617 0.700828  
N -0.444667 1.690282 0.183426  
C -2.648979 -2.318679 -1.638198  
H -2.801992 -3.304686 -2.060886  
C -2.137857 0.160753 -0.559099  
C -0.938405 3.857855 1.083280  
C -1.774201 1.458704 0.018545  
H -0.562109 4.786088 1.496432  
C -3.712166 -1.459798 -1.383774  
C -3.452285 -0.207108 -0.842404  
C -2.300424 3.627231 0.921868  
C -2.717932 2.418079 0.382744  
H -4.731897 -1.757062 -1.604552  
H -4.268145 0.476954 -0.641662  
H -3.029744 4.376621 1.210705  
H -3.774637 2.219210 0.251101  
O -2.010128 -2.259491 2.464696  
C 1.717739 -0.645602 2.208750  
O 1.914279 -0.983208 3.284203  
H -1.997456 -3.222456 2.382128

Imaginary Frequency = 175.64i

Zero-point correction = 0.221923 (Hartree/Particle)

Thermal correction to Energy = 0.245663

Thermal correction to Enthalpy = 0.246607

Thermal correction to Gibbs Free Energy = 0.166904

Sum of electronic and zero-point Energies = -1292.100347

Sum of electronic and thermal Energies = -1292.076607

Jay Agarwal et al.

Supporting Information

...

Sum of electronic and thermal Enthalpies = -1292.075663

Sum of electronic and thermal Free Energies = -1292.155366

7

Charge = 0 Multiplicity = 1

C 0.000000 0.000000 -0.651588

O 0.000000 0.000000 0.488691

Zero-point correction = 0.005011 (Hartree/Particle)

Thermal correction to Energy = 0.007372

Thermal correction to Enthalpy = 0.008316

Thermal correction to Gibbs Free Energy = -0.014131

Sum of electronic and zero-point Energies = -113.296325

Sum of electronic and thermal Energies = -113.293964

Sum of electronic and thermal Enthalpies = -113.293020

Sum of electronic and thermal Free Energies = -113.315467

**8**

Charge = 0 Multiplicity = 1

C -1.528793 0.000470 2.510149  
O -0.511613 0.000214 1.727248  
O -2.728023 0.000617 2.221558  
O -2.893698 2.164239 -0.512977  
O -2.893420 -2.164851 -0.512299  
C -2.073712 1.331202 -0.482995  
C -2.073559 -1.331682 -0.482552  
O -0.592748 -0.000699 -3.506408  
C -0.630157 -0.000473 -2.334644  
Re -0.701634 -0.000148 -0.432718  
H 0.001570 3.082866 -0.461685  
H 0.002014 -3.083076 -0.460722  
C 0.972488 2.664310 -0.217918  
N 1.042285 1.322793 -0.175087  
C 0.972874 -2.664303 -0.217095  
N 1.042473 -1.322762 -0.174666  
C 2.065291 3.480251 0.032866  
H 1.953790 4.556983 -0.014532  
C 2.230120 0.734092 0.120061  
C 2.065806 -3.480005 0.033901  
C 2.230229 -0.733796 0.120269  
H 1.954462 -4.556768 -0.013166  
C 3.283828 2.885273 0.343101  
C 3.365680 1.500181 0.384369  
C 3.284270 -2.884753 0.343899  
C 3.365918 -1.499636 0.384743  
H 4.160835 3.489392 0.549308  
H 4.307647 1.018985 0.619254  
H 4.161378 -3.488678 0.550241  
H 4.307829 -1.018226 0.619410  
O -1.137047 0.000692 3.825018  
H -1.949610 0.000921 4.347968

Zero-point correction = 0.215658 (Hartree/Particle)

Thermal correction to Energy = 0.236990

Thermal correction to Enthalpy = 0.237935

Thermal correction to Gibbs Free Energy = 0.161476

Sum of electronic and zero-point Energies = -1178.836413

Sum of electronic and thermal Energies = -1178.815080

Sum of electronic and thermal Enthalpies = -1178.814136

Sum of electronic and thermal Free Energies = -1178.890595

Transition state for equatorial CO ligand loss.

Charge = 0 Multiplicity = 1

C -3.767412 0.211289 0.204109  
O -2.772012 0.706368 0.818145  
O -3.802634 -0.377857 -0.887703  
O -2.335341 2.198414 -1.767464  
O -1.951600 -2.746083 0.503334  
C -1.596070 1.748489 -1.014311  
C -1.357614 -1.750931 0.301185  
O -0.626422 -0.919312 -3.000132  
C -0.472377 -0.600066 -1.895805  
Re -0.319390 -0.202075 0.045771  
H -0.041153 3.076996 0.184579  
H 0.742446 -3.082749 0.038897  
C 0.999528 2.777621 0.130906  
N 1.227651 1.458379 0.020241  
C 1.669794 -2.525824 -0.012738  
N 1.551223 -1.178764 0.013722  
C 2.014968 3.719572 0.183501  
H 1.767047 4.770636 0.274709  
C 2.513625 1.023060 -0.005469  
C 2.889505 -3.172358 -0.097317  
C 2.691220 -0.427567 -0.043704  
H 2.911862 -4.255663 -0.113803  
C 3.333849 3.282126 0.117440  
C 3.583504 1.920728 0.030791  
C 4.055047 -2.413855 -0.155853  
C 3.945970 -1.033383 -0.127786  
H 4.157689 3.987309 0.146952  
H 4.604031 1.559220 0.002227  
H 5.028484 -2.886989 -0.223178  
H 4.836099 -0.418559 -0.175827  
O -4.961266 0.397415 0.889584  
C -0.339461 -0.021878 2.033724  
O -0.405880 -0.005333 3.189673  
H -5.647612 -0.002911 0.339355

Imaginary Frequency = 213.75i

Zero-point correction = 0.220473 (Hartree/Particle)

Thermal correction to Energy = 0.244858

Thermal correction to Enthalpy = 0.245802

Thermal correction to Gibbs Free Energy = 0.162563

Sum of electronic and zero-point Energies = -1292.060251

Sum of electronic and thermal Energies = -1292.035866

Jay Agarwal et al.

Supporting Information

...

Sum of electronic and thermal Enthalpies = -1292.034922

Sum of electronic and thermal Free Energies = -1292.118161

### C. Experimental Methods

**General Information.** All reagents were procured from commercial suppliers and used as received unless otherwise noted.  $^{13}\text{CO}_2(\text{g})$  ( $^{13}\text{C}$ , 99%) and  $\text{DMSO-}d_6$  were purchased from Cambridge Isotope Laboratories and used without further purification. Dichloromethane ( $\text{CH}_2\text{Cl}_2$ ) was purified using activated alumina columns in an MBraun MB-SPS solvent purification system and stored over 4 Å molecular sieves under a nitrogen ( $\text{N}_2$ ) atmosphere. All reactions were performed using standard Schlenk-line and glovebox techniques under an atmosphere of purified  $\text{N}_2$  with minimal exposure to light.

**Physical Methods.** FTIR spectra were collected with a ThermoNicolet 6700 spectrophotometer running OMNIC software. Samples were run in a KBr matrix under a stream of dry  $\text{N}_2$ . All FTIR samples were prepared under  $\text{N}_2$  with minimal light exposure.  $^1\text{H}$  NMR and  $^{13}\text{C}$  NMR spectra were recorded in  $\text{DMSO-}d_6$  on a Bruker BZH 400/52 400 MHz NMR spectrometer or a Varian Unity Inova 500 MHz NMR spectrometer at 298 K. Chemical shifts were referenced to TMS or residual protio signal of the deuterated solvent.

*fac*-**Re(4,4'-dimethyl-2,2'-bipyridine)(CO) $_3$ COOH (1)**. Silver triflate (0.229 g, 1.16 mmol) was dissolved in 20 mL of degassed  $\text{CH}_2\text{Cl}_2$  and added to a flask containing  $\text{Re}(\text{CO})_5\text{Cl}$  (0.401 g, 1.11 mmol) dissolved in 80 mL of  $\text{CH}_2\text{Cl}_2$ . This clear solution was allowed to stir at room temperature for 18 hrs. The white  $\text{AgCl}$  precipitate was removed by filtration and washed with  $\text{CH}_2\text{Cl}_2$ . An aliquot of 4,4'-dimethyl-2,2'-bipyridine (0.221 g, 1.20 mmol) was added to the filtrate, and the solution was stirred for 8 hrs. The resulting yellow-green solution was reduced to 20 mL under vacuum. The addition of hexanes afforded a yellow precipitate, which was collected by filtration and dried under vacuum to yield 0.456 g (0.72 mmol, 65 %) of a light yellow solid. This intermediate, *fac*-**Re(4,4'-dimethyl-2,2'-bipyridine)(CO) $_4$ (CF $_3$ SO $_3$ )**, was confirmed by IR spectroscopy and used without further purification. The intermediate (0.456 g, 0.72 mmol) was dissolved in 60 mL of deionized water. Potassium hydroxide (0.040 g, 0.71 mmol) was added to the rhenium solution, which was allowed to stir for 1 hr. A yellow precipitate formed almost immediately after the addition of KOH. The precipitate was collected by filtration and dried under vacuum, yielding 0.266 g (0.56 mmol, 78 %) of product. IR  $\nu_{\text{CO}}$  (KBr,  $\text{cm}^{-1}$ ): 2008 (s), 1916 (sh), 1880 (s).  $^1\text{H}$  NMR ( $\text{DMSO-}d_6$ , 25 °C):  $\delta$  9.02 (1H, s), 8.79 (2H, d, J=4Hz), 8.58 (2H, s), 7.50 (2H, d, J=4Hz), 2.53 (6H, s).

**Reaction of *fac*-Re(dmb)(CO) $_3$ COOH (1) with  $\text{CO}_2$ .** Complex **1** (0.035g, 0.07 mmol) was dissolved in approximately 2.25 mL of  $\text{DMSO-}d_6$ , yielding a dark yellow mixture. The solution was purged with either unlabeled or  $^{13}\text{C}$  labeled  $\text{CO}_2$  then allowed to stand for 2 hrs in the dark. Reaction of  $\text{Re}(\text{dmb})\text{CO}_3\text{COOH}$  and  $\text{CO}_2$  in dark after 2 h.  $^1\text{H}$  NMR ( $\text{DMSO-}d_6$ , 25 °C):  $\delta$  9.11 (1H, br), 8.86 (2H, d, J=5Hz), 8.59 (2H, s), 7.58 (2H, d, J=5Hz), 2.53 (6H, s).  $^{13}\text{C}$  NMR ( $\text{DMSO-}d_6$ , 25 °C):  $\delta$  198.33, 194.61, 158.61 (OCO $_2$ H), 154.95, 152.68, 152.46, 128.09, 124.56, 20.97. IR  $\nu_{\text{CO}}$  (KBr,  $\text{cm}^{-1}$ ): 2028 (s), 1905 (s), 1857 (s), 1621 (m), 1416 (m), 1346 (m) Reaction of  $\text{Re}(\text{dmb})\text{CO}_3\text{COOH}$  and  $^{13}\text{CO}_2$  in dark after 2 h.  $^1\text{H}$  NMR ( $\text{DMSO-}d_6$ , 25 °C):  $\delta$  9.10 (1H, br), 8.86 (2H, d, J=8Hz), 8.61 (2H, s), 7.58 (2H, d, J=8Hz), 2.54 (6H, s).  $^{13}\text{C}$  NMR ( $\text{DMSO-}d_6$ , 25 °C):  $\delta$  198.33, 194.62, 158.62 (O $^{13}\text{C}$ OOH), 154.94, 152.66, 152.46, 128.08, 124.57, 20.96. IR  $\nu_{\text{CO}}$  (KBr,  $\text{cm}^{-1}$ ): 2027 (s), 1904 (s), 1858 (s), 1574 (m), 1393 (w), 1330 (m)

## D. Data from Experiment

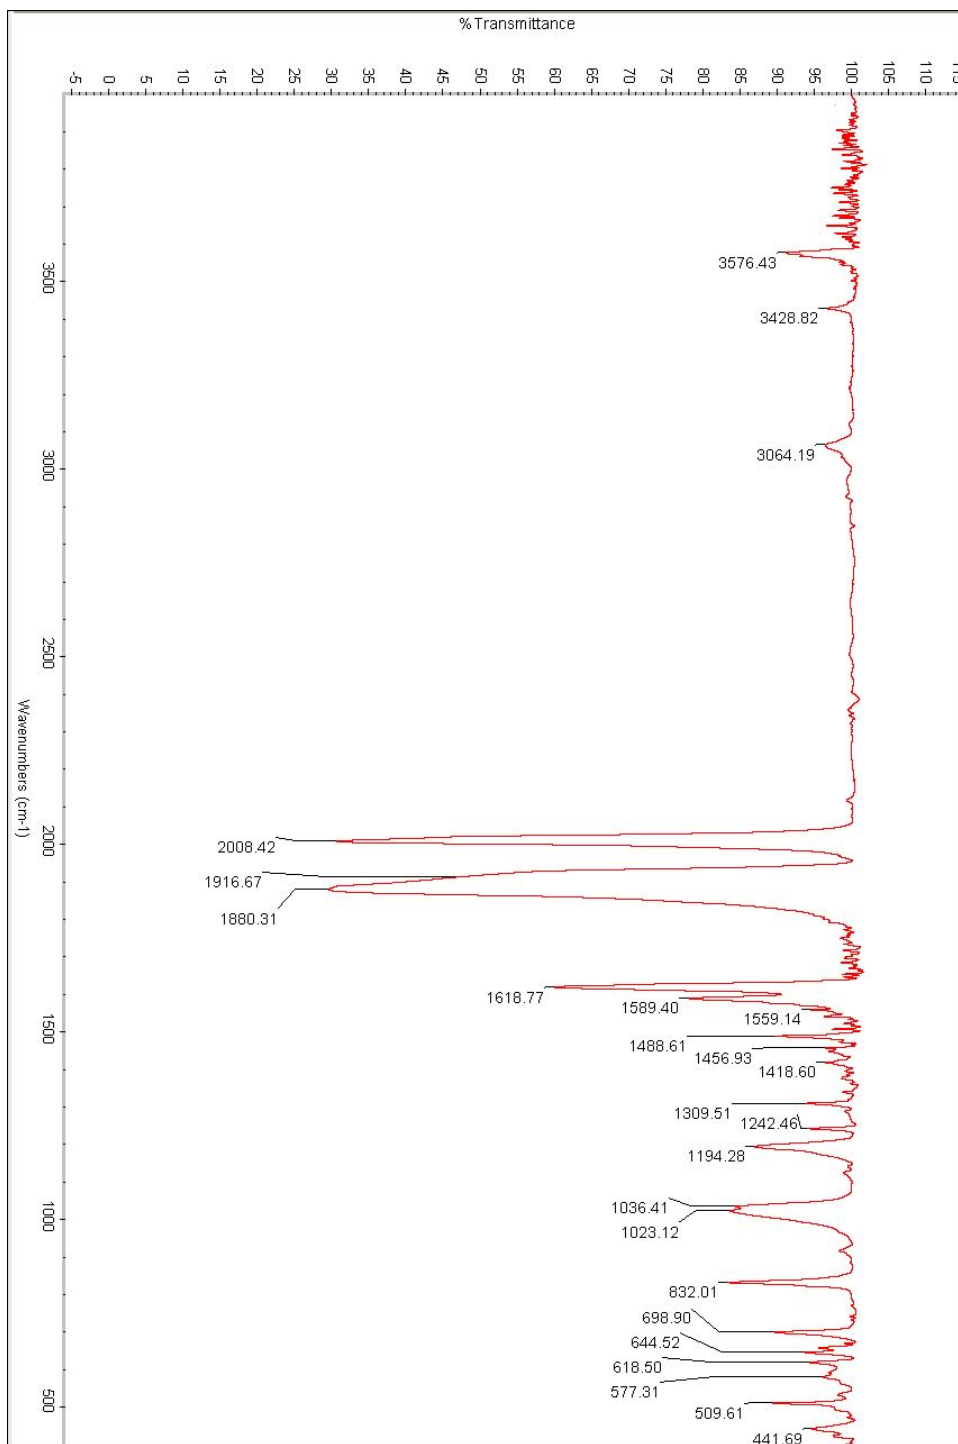

**Figure SI-3:** FTIR Spectrum of Re(dmb)(CO)<sub>3</sub>COOH (1) (KBr matrix).



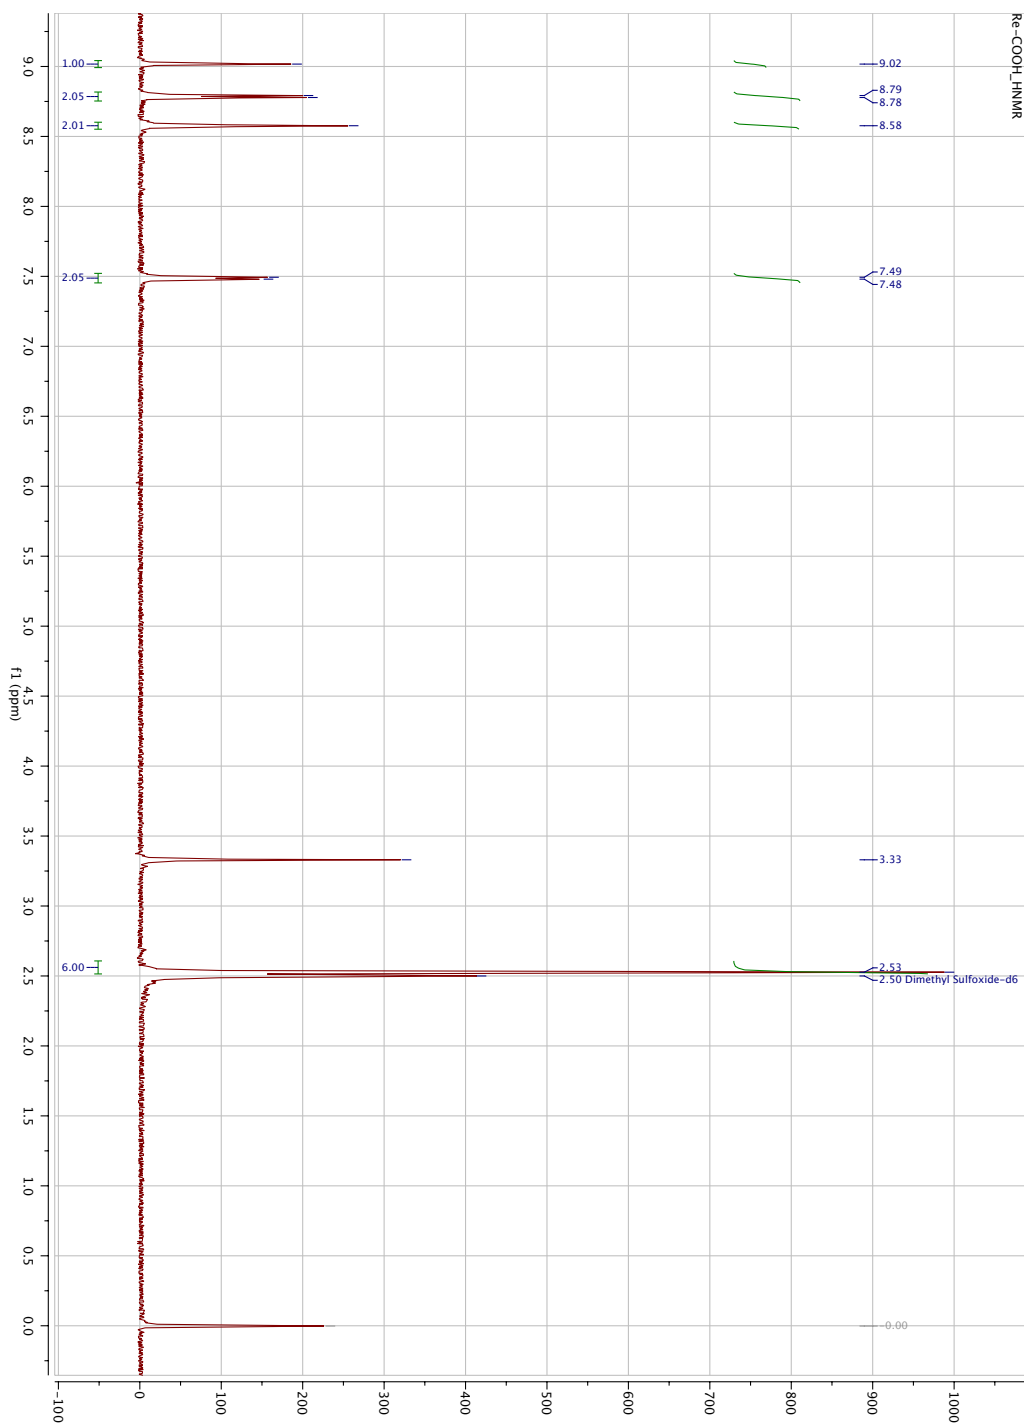

Figure SI-4:  $^1\text{H}$  NMR Spectrum of  $\text{Re}(\text{dmb})(\text{CO})_3\text{COOH}$  (1) in  $\text{DMSO-}d_6$ .

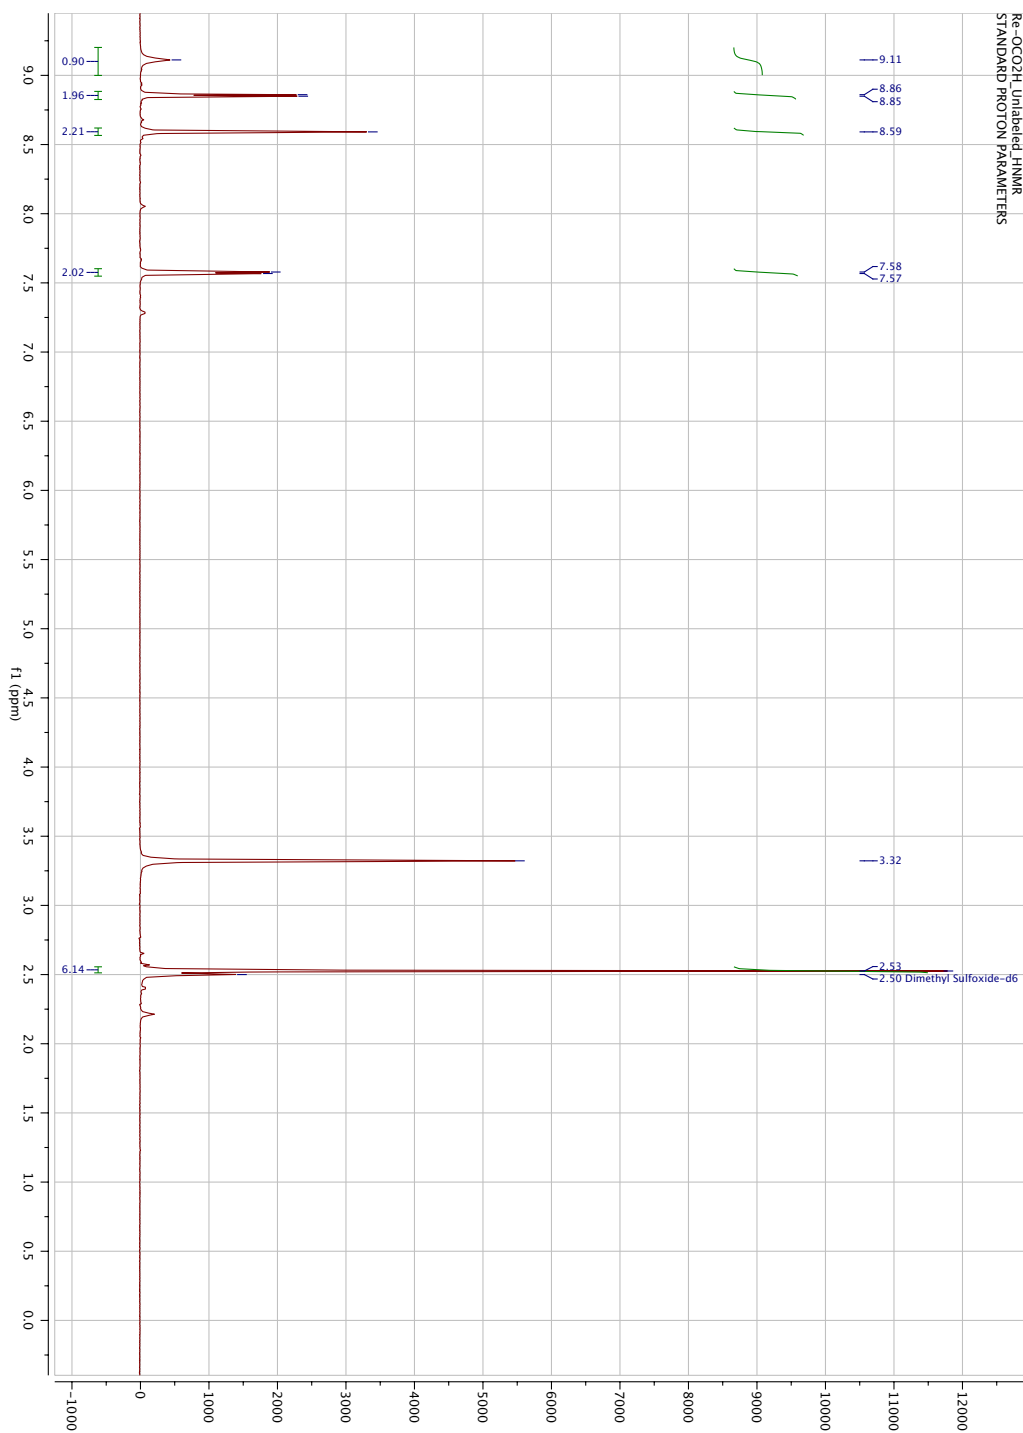

**Figure SI-5:** <sup>1</sup>H NMR Spectrum of Re(dmb)(CO)<sub>3</sub>OCO<sub>2</sub>H (**8**), from the reaction of Re(dmb)(CO)<sub>3</sub>COOH (**1**) with CO<sub>2</sub>, in DMSO-*d*<sub>6</sub>.

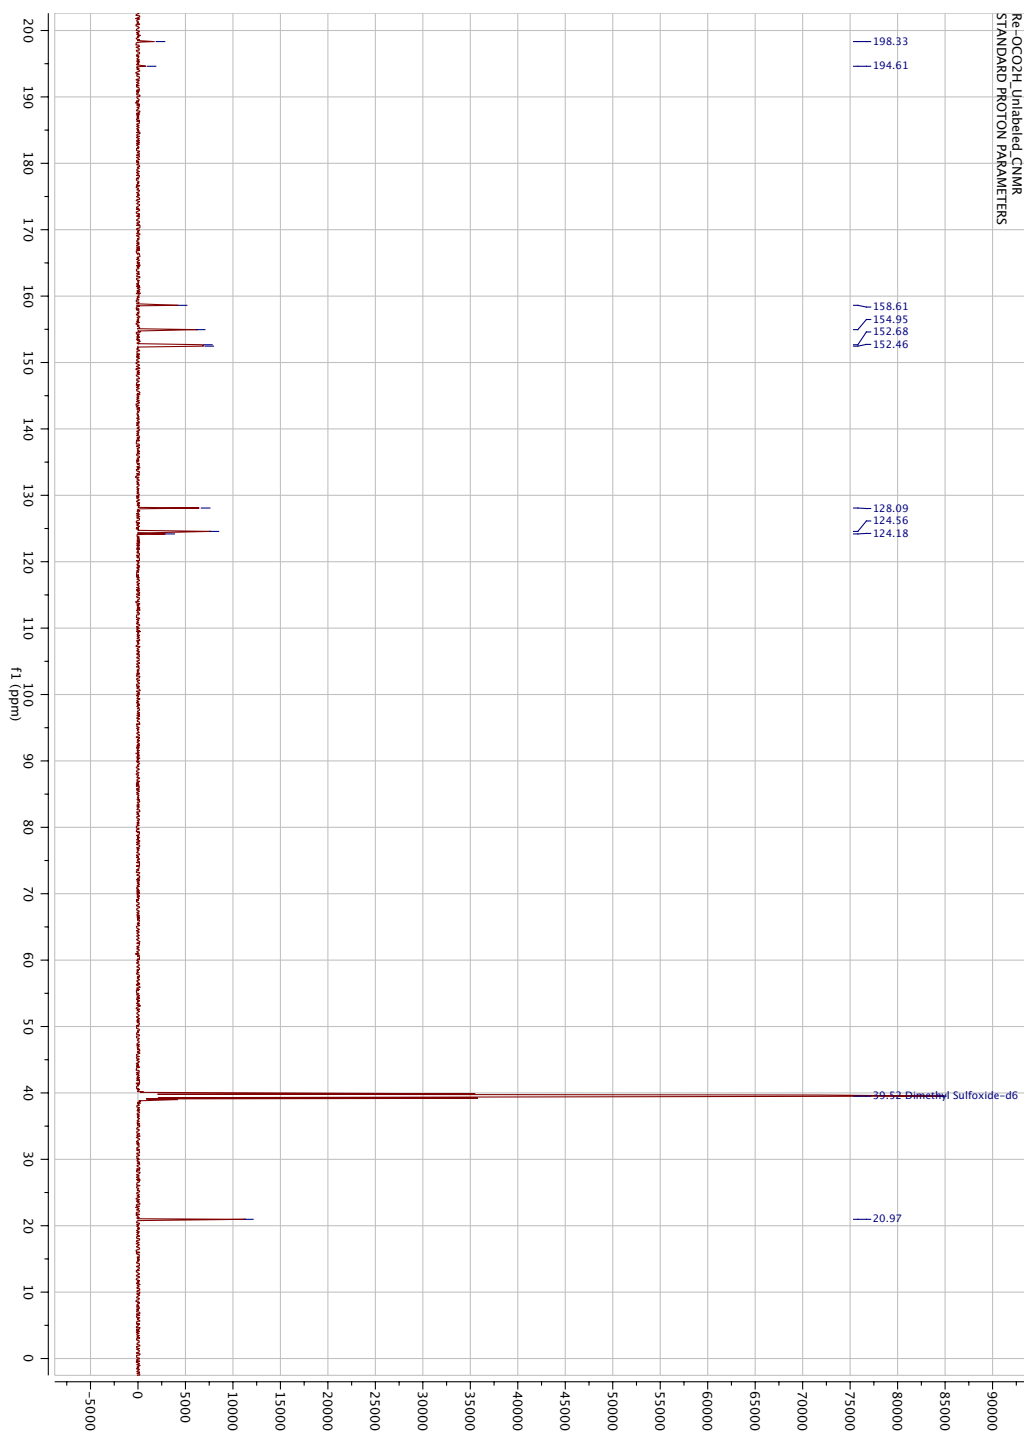

**Figure SI-6:**  $^{13}\text{C}$  NMR Spectrum of  $\text{Re}(\text{dmb})(\text{CO})_3\text{OCO}_2\text{H}$  (**8**), from the reaction of  $\text{Re}(\text{dmb})(\text{CO})_3\text{COOH}$  (**1**) with  $\text{CO}_2$ , in  $\text{DMSO}-d_6$ . The peak at 124.18 ppm is assigned to the carbon atom of  $\text{CO}_2$ .

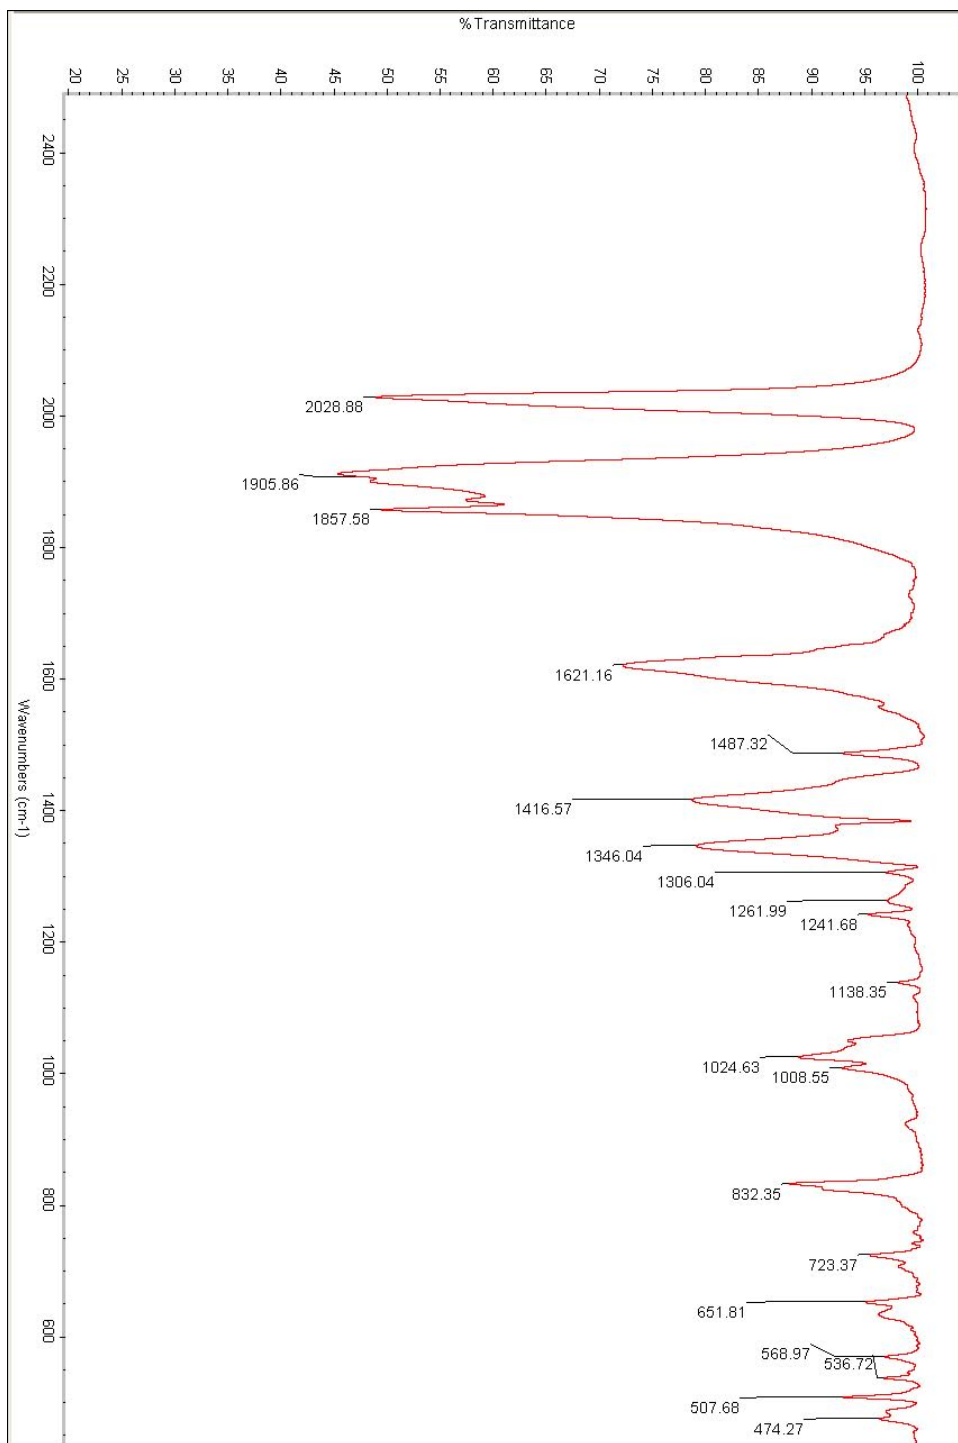

**Figure SI-7:** FTIR Spectrum of  $\text{Re(dmb)(CO)}_3\text{OCO}_2\text{H}$  (**8**), from the reaction of  $\text{Re(dmb)(CO)}_3\text{COOH}$  (**1**) with  $\text{CO}_2$  (KBr Matrix).

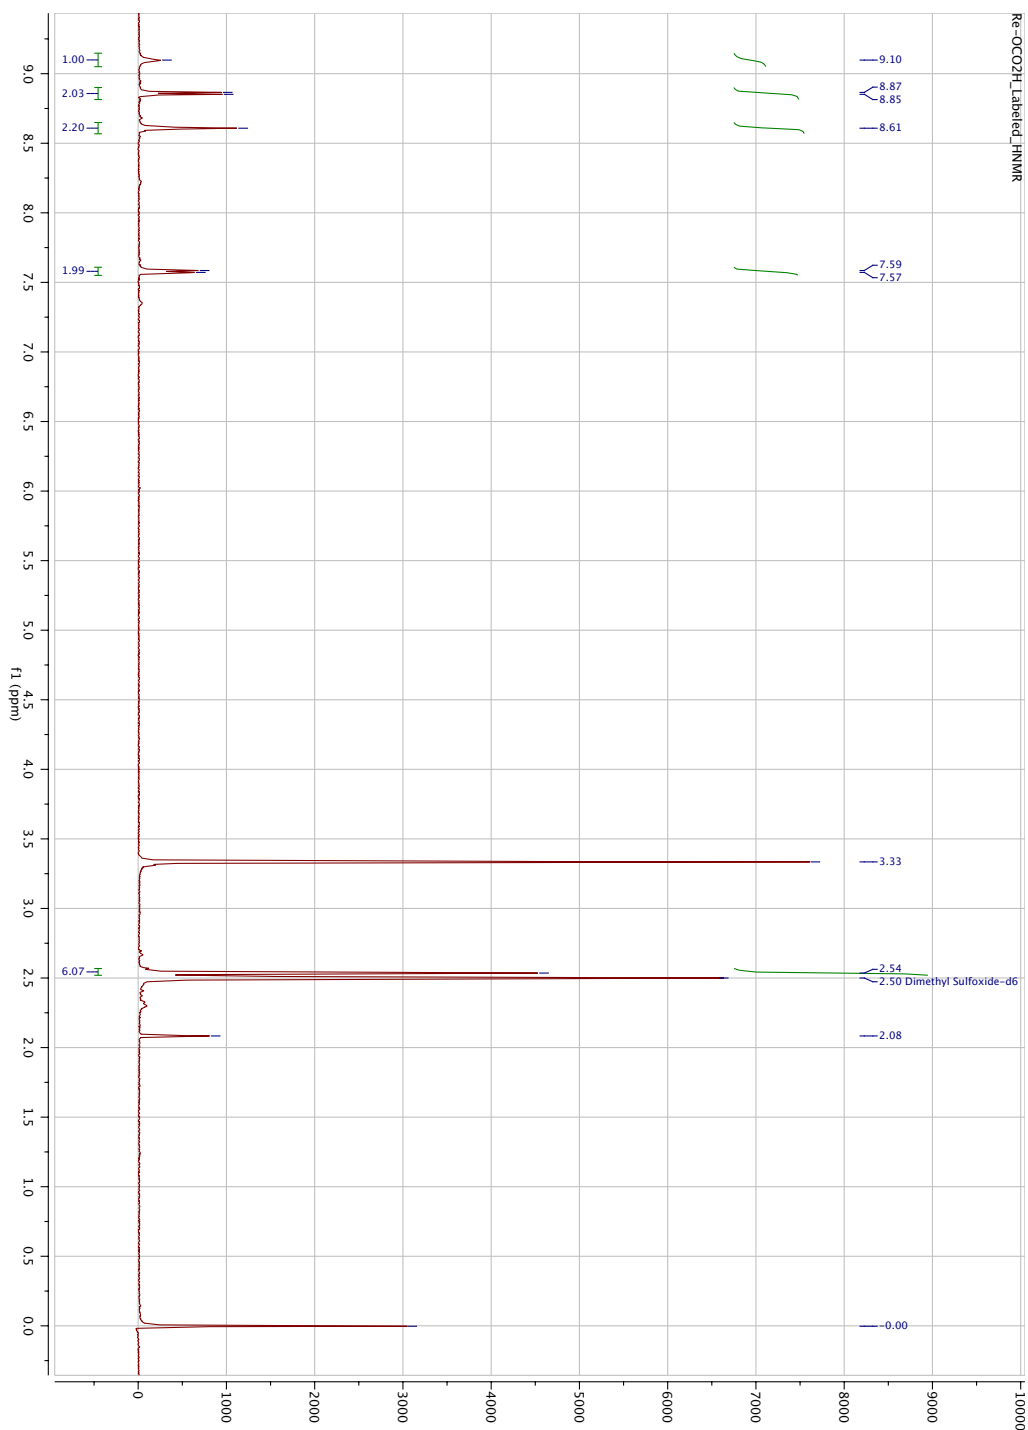

**Figure SI-8:**  $^1\text{H}$  NMR Spectrum of  $\text{Re}(\text{dmb})(\text{CO})_3\text{OCO}_2\text{H}$  (**8**), from the reaction of  $\text{Re}(\text{dmb})(\text{CO})_3\text{COOH}$  (**1**) with  $^{13}\text{CO}_2$ , in  $\text{DMSO}-d_6$ . The peak at 2.08 ppm is assigned to acetone.

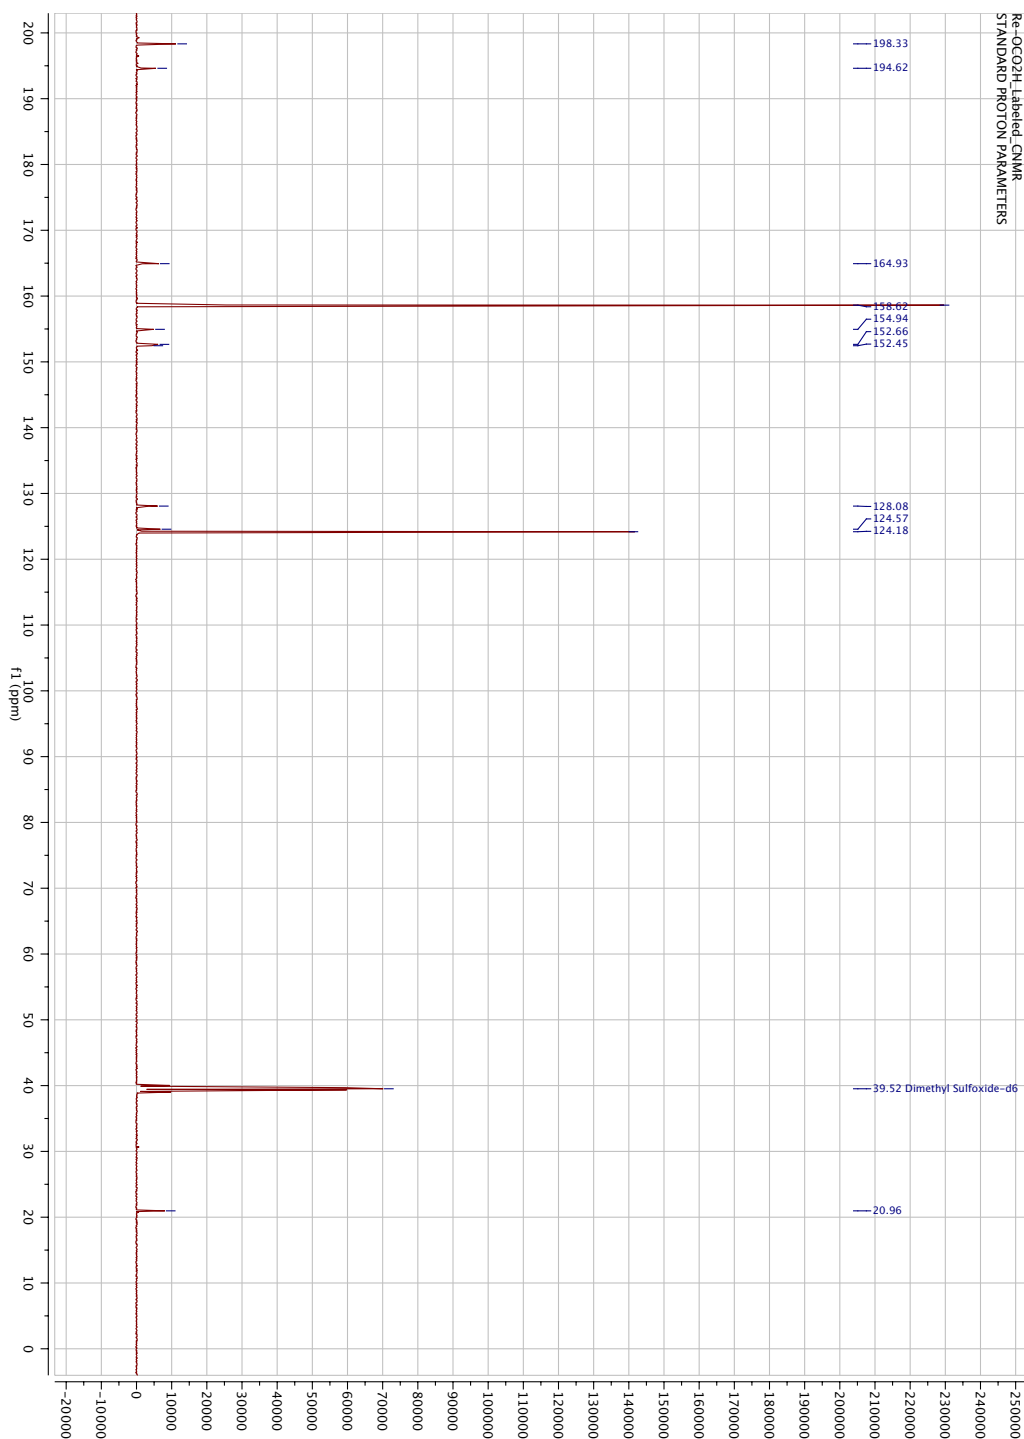

**Figure SI-9:**  $^{13}\text{C}$  NMR Spectrum of  $\text{Re}(\text{dmb})(\text{CO})_3\text{OCO}_2\text{H}$  (**8**), from the reaction of  $\text{Re}(\text{dmb})(\text{CO})_3\text{COOH}$  (**1**) with  $^{13}\text{CO}_2$ , in  $\text{DMSO}-d_6$ . The peak at 124.18 ppm is assigned to the carbon atom of  $\text{CO}_2$ . The peak at 164.93 ppm is assigned to the carbon atom of  $\text{HOCO}_2^-$ .

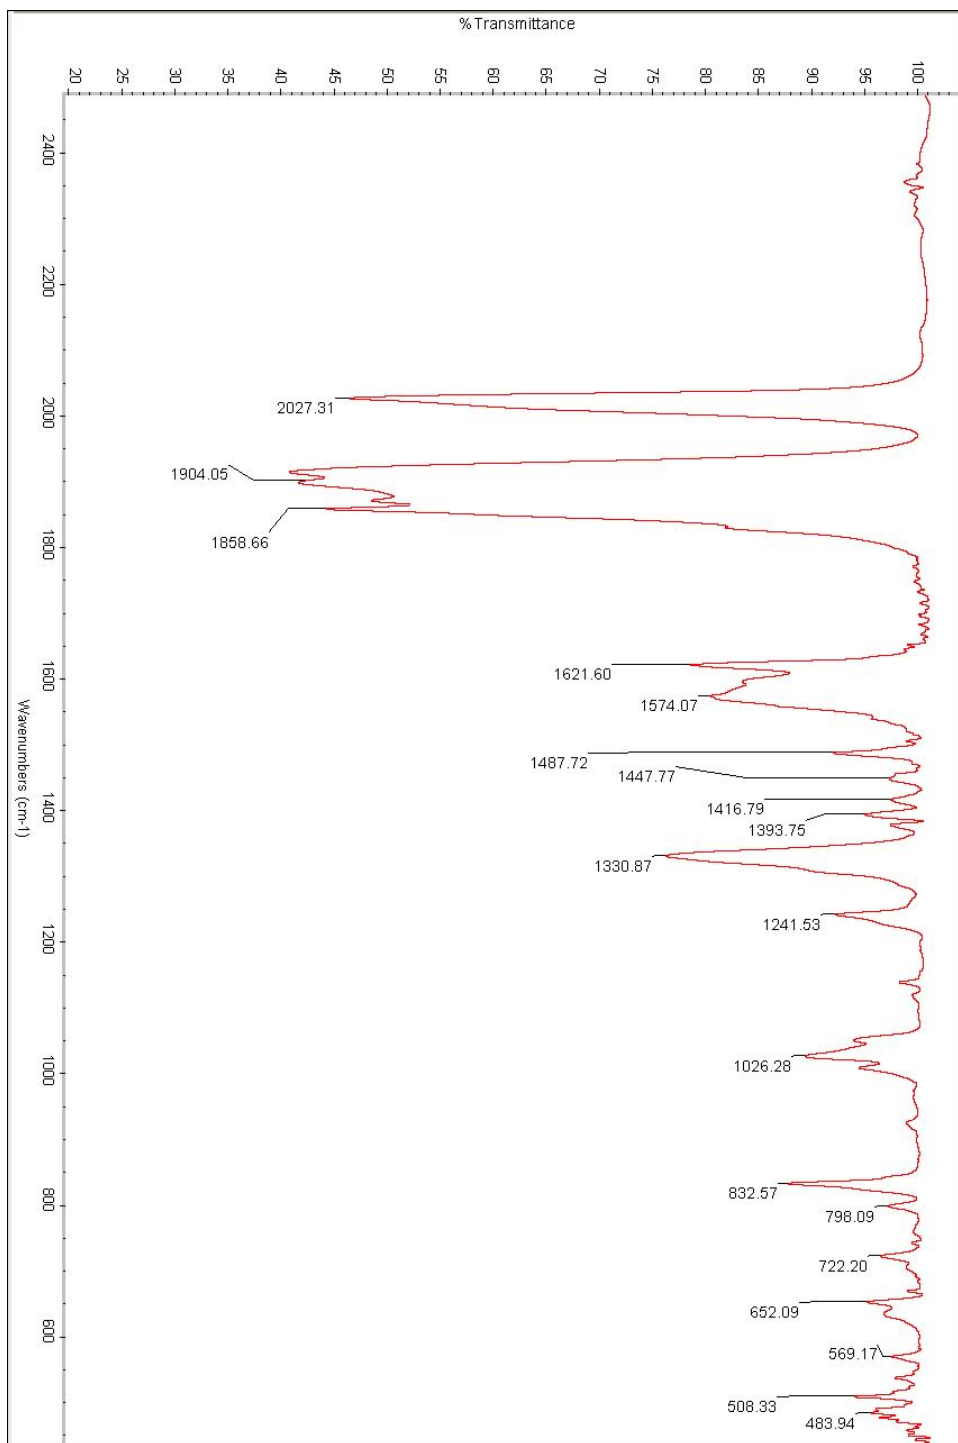

**Figure SI-10:** FTIR Spectrum of  $\text{Re}(\text{dmb})(\text{CO})_3\text{OCO}_2\text{H}$  (**8**), from the reaction of  $\text{Re}(\text{dmb})(\text{CO})_3\text{COOH}$  (**1**) with  $^{13}\text{CO}_2$  (KBr Matrix).
